# Supplementary material for: A Statistical Method to Base Nutrient Recommendations on Meta-Analysis of Intake and Health-Related Status Biomarkers
Source: PubMed Central journal article supplement (PMC3969369; doi:10.1371/journal.pone.0093171), 2014-03-28
Supplement: pone.0093171.s001.pdf [file pone.0093171.s001.pdf]

# A Statistical Method to Base Nutrient Recommendations on Meta-Analysis of Intake and Health-Related Status Biomarkers

Hilko van der Voet, Waldo J. de Boer, Olga W. Souverein, Esmée L. Doets, Pieter van 't Veer

## Appendix S1: Derivation of nutrient intakes under the stochastic model.

The stochastic model (bivariate normal distribution for log intake and log status) implies a linear regression line when predicting  $\ln(\text{status})$  from  $\ln(\text{intake})$ . For error-free observations this relation is

$$S_i = ANS + \beta_1 (I_i - ANI) \quad (\text{A.1})$$

with subscript  $i$  indicating any individual person in the population of interest.

In our model it is assumed that for each individual  $i$  the measured  $\ln$  status ( $y_i$ ) is a linear function of the deviation of the true  $\ln$  intake ( $I_i$ ) from the individual  $\ln$  requirement ( $R_i$ ), plus random measurement error ( $e_i$ ) with mean 0 and variance  $\sigma_e^2$ . The measured  $\ln$  intake ( $x_i$ ) is assumed to be also a linear function of the true  $\ln$  intake ( $I_i$ ), plus random measurement error ( $d_i$ ) with mean 0 and variance  $\sigma_d^2$ . Parallel lines are assumed for all individuals. The model can thus be written as

$$y_i = S_0 + \beta_1 (I_i - R_i) + e_i; \quad x_i = \beta_{Q0} + \beta_{Q1} I_i + d_i \quad (\text{A.2})$$

The parameters  $S_0$  and  $\beta_1$  are the parameters of interest in the ‘disease model’, where  $S_0$  is the  $\ln$  status value expected for any individual who exactly satisfies his personal intake requirement. This is the external nutrient status cut-off value to classify health as sufficient or insufficient. The parameters  $\beta_{Q0}$  and  $\beta_{Q1}$  describe the general and intake-related bias in the model describing questionnaire data used to assess nutrient intake. Note that absence of general bias at the average nutrient intake ( $ANI$ ) level is represented by  $\beta_{Q0} = (1 - \beta_{Q1}) ANI$ , so that  $x_i = ANI + \beta_{Q1} (I_i - ANI) + d_i$ . Assuming also absence of intake-related bias we would set  $\beta_{Q1} = 1$ , reducing the model to the simple measurement error model  $x_i = I_i + d_i$ .

The relation between the observed quantities  $x_i$  and  $y_i$  is obtained by elimination of the unknown true intake. After introducing centring constants  $ANI$ ,  $ANS$  and  $ANR$  for  $x$ ,  $y$  and  $R$  respectively, the model can be written as

$$y_i = ANS + \beta_1 \beta_{Q1}^{-1} (x_i - d_i - ANI) + \beta_1 (ANR - R_i) + e_i \quad (\text{A.3})$$

where

$$ANR = (ANI - \beta_{Q0}) / \beta_{Q1} + (S_0 - ANS) / \beta_1 \quad (A.4)$$

In the following we assume absence of general bias in the observed intakes, in which case the latter equation simplifies to

$$ANR = ANI + (S_0 - ANS) / \beta_1 \quad (A.5)$$

$ANR$  is therefore the intersection of the line with slope  $\beta_1$  through  $(ANI, ANS)$  with the line  $y = S_0$ .

$ANR$  and  $INL_p$  are defined as the median and  $p^{\text{th}}$  percentile of the nutrient requirements distribution.  $INL_p$  is  $ANR$  plus an appropriate multiple of the requirements standard deviation:

$$INL_p = ANR + z_p SDNR \quad (A.6)$$

In the bivariate model the deviations from the true regression line are explained by variation in individual requirements around  $ANR$  (see Figure 1A). Consequently,

$$SDNS^2 = \beta_1^2 (SDNI^2 + SDNR^2) \quad (A.7)$$

and, given the true parameters of the bivariate distribution, the standard deviation of nutrient requirements  $SDNR$  and the coefficient of variation for nutrient requirements  $CVNR$  can be estimated by

$$SDNR = \sqrt{(SDNS / \beta_1)^2 - SDNI^2}; \quad CVNR = \sqrt{\exp(SDNR^2) - 1} \quad (A.8)$$

The PNL is defined as the intake level where  $p$  % of the  $S$  distribution is above  $S_0$ , so from equation A.1

$$S_0 + z_p SDNS = ANS + \beta_1 (PNL_p - ANI) \quad (A.9)$$

which using equation 5 can be rewritten as

$$PNL_p = ANR + z_p SDNS / \beta_1 \quad (A.10)$$
